# Supplementary material for: Fluorine doped Fe2O3 nanostructures by a one-pot plasma-assisted strategy
Source: Royal Society of Chemistry journal article supplement (doi:10.1039/c3ra43775b), 2013-01-01
Supplement: c3ra43775b.pdf [file c3ra43775b.pdf]

## **Electronic Supplementary Information**

for:

### **Fluorine doped Fe<sub>2</sub>O<sub>3</sub> nanostructures by a one-pot plasma-assisted strategy**

*G. Carraro,<sup>a</sup> A. Gasparotto,<sup>a</sup> C. Maccato,<sup>a</sup> E. Bontempi,<sup>b</sup> O. I. Lebedev,<sup>c</sup>  
S. Turner,<sup>d</sup> C. Sada,<sup>e</sup> L. E. Depero,<sup>b</sup> G. Van Tendeloo<sup>d</sup> and D. Barreca<sup>\*f</sup>*

<sup>a</sup> *Department of Chemistry - Padova University and INSTM - 35131 Padova, Italy.*

<sup>b</sup> *Chemistry for Technologies Laboratory - Brescia University and INSTM - 25123 Brescia, Italy.*

<sup>c</sup> *Laboratoire CRISMAT - UMR 6508 - CNRS-ENSICAEN - 14050 Caen Cedex 4, France.*

<sup>d</sup> *EMAT - Antwerpen University - 2020 Antwerpen, Belgium.*

<sup>e</sup> *Department of Physics and Astronomy - Padova University, 35131 Padova, Italy.*

<sup>f</sup> *CNR-IENI and INSTM - Department of Chemistry - Padova University - 35131 Padova, Italy.*

Tel: + 39 049 8275170; E-mail: [davide.barreca@unipd.it](mailto:davide.barreca@unipd.it)

\*Corresponding author: Tel: + 39 049 8275170; Fax: + 39 049 8275161; E-mail:  
[davide.barreca@unipd.it](mailto:davide.barreca@unipd.it) (D.B.).

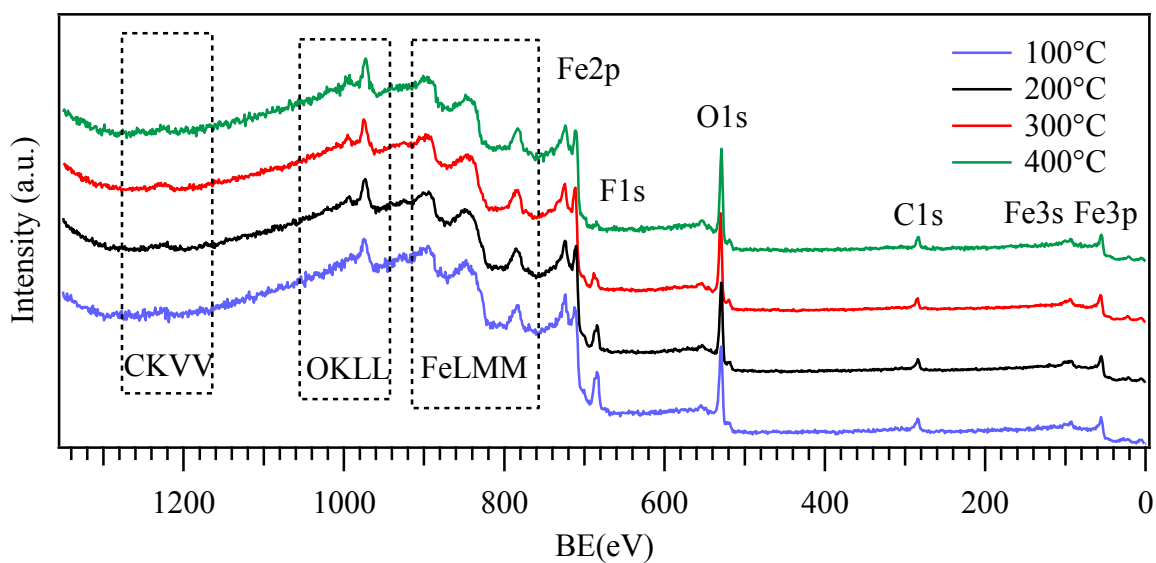

**Figure S1.** Surface XPS survey spectra for F-doped  $\text{Fe}_2\text{O}_3$  specimens deposited at various temperatures.

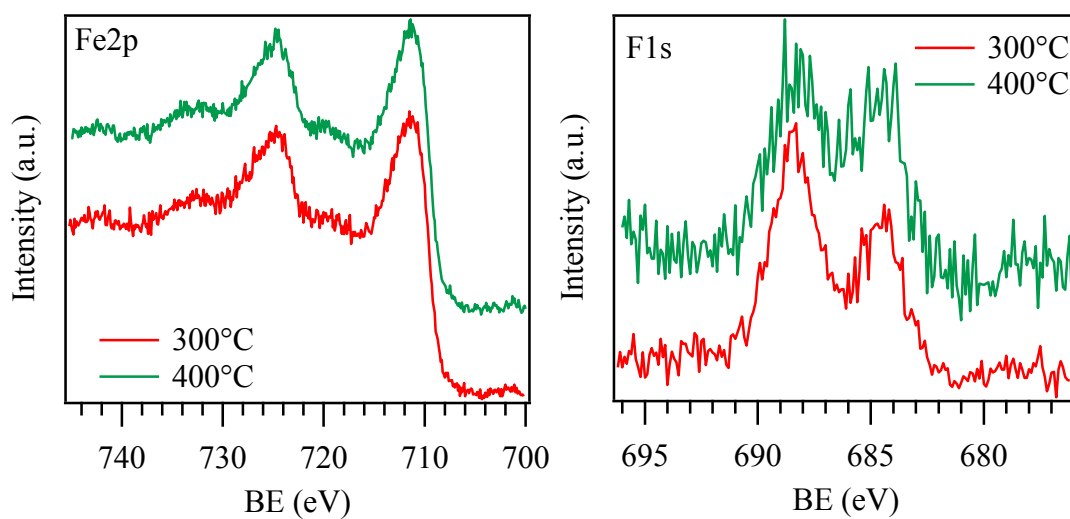

**Figure S2.** Core-level Fe2p and F1s surface peaks for specimen grown at 300 and 400°C.

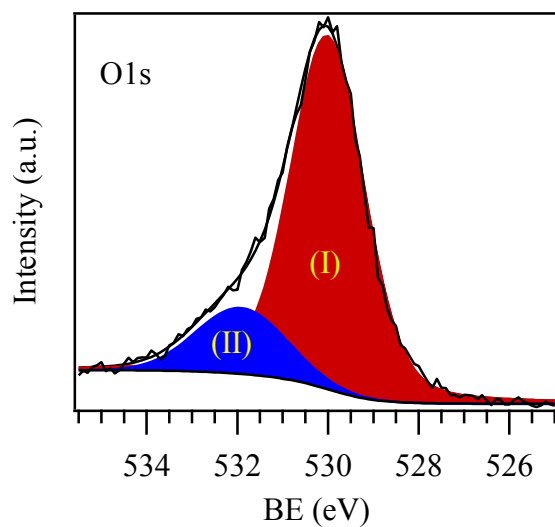

**Figure S3.** Core-level O1s surface peak for specimen grown at 300°C.

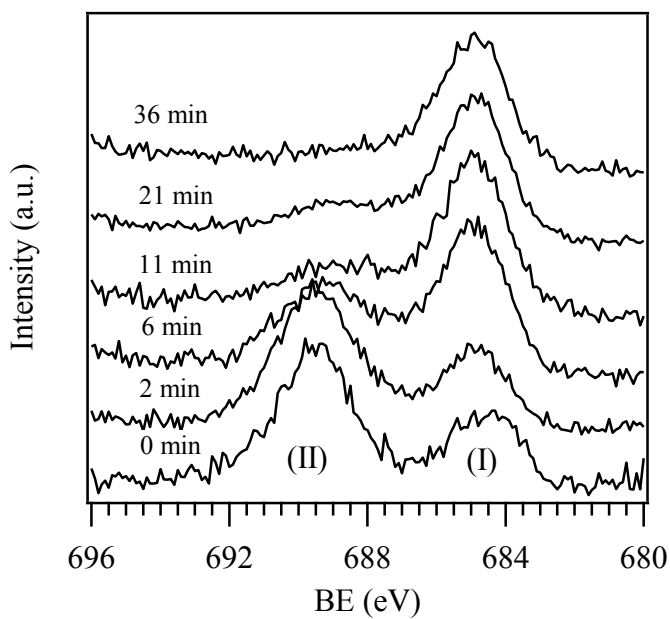

**Figure S4.** Core-level F1s peak for specimen grown at 300°C as a function of the Ar<sup>+</sup> sputtering time.
